# Supplementary material for: Saliva-Induced Clotting Captures Streptococci: Novel Roles for Coagulation and Fibrinolysis in Host Defense and Immune Evasion
Source: PubMed Central journal article supplement (PMC5038080; doi:10.1128/iai.00307-16), 2016-09-19
Supplement: IAI.00307-16_zii999091834so1.pdf [file IAI.00307-16_zii999091834so1.pdf]

1 Supplementary material

2

3 **Legends to supplementary tables**

4

5 **Supplementary table S1**

6 **Coagulation experiments with and without bacteria.** Each row represents a  
7 treatment. H-D-Pro-Phe-Arg-CMK is an inhibitor of FXII and PK. P<3 is the fraction  
8 of plasma smaller than 3 kDa. S<3 is the fraction of saliva smaller than 3 kDa. S>3 is  
9 the fraction of saliva larger than 3 kDa. Fractions are the flow-through and retentate,  
10 respectively, from centrifugal filters with a 3 kDa cut-off.

11

12 **Supplementary table S2**

13 List of proteins and protein chains quantified in saliva-plasma clots with and without  
14 bacteria using shotgun MS. The intensity values are from three biological replicates  
15 per sample-group. The denoted protein groups are the same as used in *fig. 1 c*. The  
16 ignored group contains protein chains of which intensity values were omitted in *fig. 1*  
17 *c*. The proteins were identified with the Trans Proteomic Pipeline software  
18 environment using 1% False Discovery Rate (FDR), and Label-free quantification  
19 values were determined by OpenMS. Multiple t-test (one by row) of replicate  
20 intensity values calculated with the software GraphPad Prism 6.0 assuming that all  
21 rows were sampled from populations with equal variance and the Q-value (FDR) set  
22 to 1%.

23

24

25

26 **Supplementary tables**

27

28 **Supplementary table S1**

29 **Coagulation experiments with and without bacteria.**

| <b>Coagulation experiments with bacteria</b>             |                                   |                                    |                                          |                  |
|----------------------------------------------------------|-----------------------------------|------------------------------------|------------------------------------------|------------------|
| 180 µl saliva                                            | 20 µl plasma                      | 4×10 <sup>7</sup> cfu G45 bacteria |                                          |                  |
| 180 µl saliva                                            | 20 µl plasma                      | 4×10 <sup>7</sup> cfu G45 bacteria | 10 µg/ml Chloramphenicol                 |                  |
| 180 µl saliva                                            | 20 µl plasminogen depleted plasma | 4×10 <sup>7</sup> cfu G45 bacteria | 6×10 <sup>-7</sup> mol CaCl <sub>2</sub> |                  |
| 180 µl saliva                                            | 20 µl plasminogen depleted plasma | 4×10 <sup>7</sup> cfu G45 bacteria | 6×10 <sup>-7</sup> mol CaCl <sub>2</sub> | 4 µg plasminogen |
| <b>Coagulation experiments without bacteria</b>          |                                   |                                    |                                          |                  |
| 180 µl saliva                                            |                                   | 20 µl plasma                       |                                          |                  |
| 180 µl saliva                                            |                                   | 20 µl plasma                       | 4 µg anti-FVII antibody                  |                  |
| 180 µl saliva                                            |                                   | 20 µl plasma                       | 4 µg control antibody                    |                  |
| 180 µl saliva                                            |                                   | 20 µl plasma                       | 10 µg H-D-Pro-Phe-Arg-CMK                |                  |
| 180 µl saliva                                            |                                   | 20 µl plasma                       | 1 µg H-D-Pro-Phe-Arg-CMK                 |                  |
| 200 µl saliva                                            |                                   |                                    |                                          |                  |
| 180 µl P<3                                               |                                   | 20 µl plasma                       |                                          |                  |
| 180 µl S<3                                               |                                   | 20 µl plasma                       |                                          |                  |
| 180 µl S>3 in 8.5 g/l NaCl with 1.7 mM CaCl <sub>2</sub> |                                   | 20 µl plasma                       |                                          |                  |

|                                                              |              |                                 |
|--------------------------------------------------------------|--------------|---------------------------------|
| 180 µl S>3 in 8.5 g/l NaCl<br>with 1.7 mM CaCl <sub>2</sub>  | 20 µl plasma | 4 µg anti-FVII antibody         |
| 180 µl S>3 in 8.5 g/l NaCl<br>with 1.7 mM CaCl <sub>2</sub>  | 20 µl plasma | 4 µg control antibody           |
| 180 µl S>3 in 8.5 g/l NaCl<br>with 1.7 mM CaCl <sub>2</sub>  | 20 µl plasma | 10 µg H-D-Pro-Phe-Arg-CMK       |
| 180 µl S<3                                                   | 20 µl plasma | 4 µg anti-FVII antibody         |
| 180 µl S<3                                                   | 20 µl plasma | 10 µg H-D-Pro-Phe-Arg-CMK       |
| 47 µl P<3                                                    | 20 µl plasma | 133 µl 1.7 mM CaCl <sub>2</sub> |
| 180 µl S<3                                                   | 20 µl plasma | 1.3 mg NaCl                     |
| 180 µl 8.5 g/l NaCl with 1.7<br>mM CaCl <sub>2</sub>         | 20 µl plasma |                                 |
| 180 µl 2.24 g/l NaCl with 1.7<br>mM CaCl <sub>2</sub>        | 20 µl plasma |                                 |
| 180 µl S>3 in 2.24 g/l NaCl<br>with 1.7 mM CaCl <sub>2</sub> | 20 µl plasma |                                 |

30

31 **Supplementary table S2**
